# Supplementary material for: Graphene Oxide/Fe3O4/Chitosan−Coated Nonwoven Polyester Fabric Extracted from Disposable Face Mask for Enhanced Efficiency of Organic Dye Adsorption
Source: Hindawi journal article supplement (doi:10.1155/2022/8055615), 2022-01-01
Supplement: f1 [file 8055615.f1.pdf]

**SUPPORTING INFORMATION**

**Graphene Oxide/Fe<sub>3</sub>O<sub>4</sub>/Chitosan-Coated Non-woven Polyester  
Fabric Extracted from Disposable Face Mask for Enhanced  
Efficiency of Organic Dye Adsorption**

**Hoang V. Tran <sup>1,\*</sup>, Nhan T. Hoang <sup>1</sup>, Thu D. Le <sup>1</sup>, Luyen T. Tran <sup>1</sup>, Hue T. M. Dang <sup>1</sup>**

*<sup>1</sup> School of Chemical Engineering, Hanoi University of Science and Technology, 1 Dai Co*

*Viet Road, Hanoi, Vietnam*

**Table IS.1. Molecular structure and some specific properties of MB, MO, CR and RS**

| <b>Dye</b>         | <b>Molecular structure</b>                                                                                                                                                                                              | <b>Type of organic dyes</b> | <b>Chemical and physical properties</b>                                                            | <b>Applications</b>                                                                         | <b>Harmful in waste water</b>                                                                                | <b>Refs.</b> |
|--------------------|-------------------------------------------------------------------------------------------------------------------------------------------------------------------------------------------------------------------------|-----------------------------|----------------------------------------------------------------------------------------------------|---------------------------------------------------------------------------------------------|--------------------------------------------------------------------------------------------------------------|--------------|
| Metylen blue (MB)  | 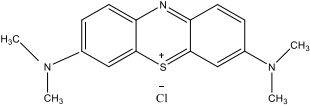                                                                                                                                       | Cation                      | $M_w = 319.85 \text{ g mol}^{-1}$ ,<br>solubility in water (pH 7; 25 ° C): $33.5 \text{ g l}^{-1}$ | Colorant for dyeing, leather, wood, printing ink, chemical field, biomedicine, aquaculture. | Cause eye, skin diseases, even cancer, prevent of oxygen absorption of aquatic organism.                     | [1-3]        |
| Methyl Orange (MO) | <p>Acidic environment</p>  <p>Neutral and base</p>    | Cation/anion<br><br>Anion   | $M_w = 327.34 \text{ g mol}^{-1}$ ,<br>Solubility in water (pH 7; 25°C): $5 \text{ g l}^{-1}$      | Indicator , dyeing animal fiber, wool, silk, synthetic fiber.                               | Strong toxicity, causing skin diseases in contact, affect many organs and in some cases it can cause deaths. | [4, 5]       |
| Congo Red (CR)     | <p>Acidic environment</p>  <p>Neutral and base</p>  | Cation<br><br>Anion         | $M_w = 696.67 \text{ g mol}^{-1}$ ;<br>solubility in water (pH 7; 25 °C): $25 \text{ g l}^{-1}$    | Indicator, use in paper, textile, rubber, gram staining.                                    | Causes skin disease, cancer, reduce oxygen and sunlight absorption..                                         | [6-9]        |
| Moderacid red (RS) |                                                                                                                                      | Anion                       | $M_w = 604.48 \text{ g mol}^{-1}$ ;<br>solubility in water (pH 7; 25°C): $80 \text{ g l}^{-1}$     | Dyeing for wool, nylon, plastic, paper, food coloring, cosmetic, animal feed.               | May cause tumors, allergies, respiratory problem.                                                            | [4, 10-12]   |

## 1. Characterizations of synthesized graphene oxide (GO)

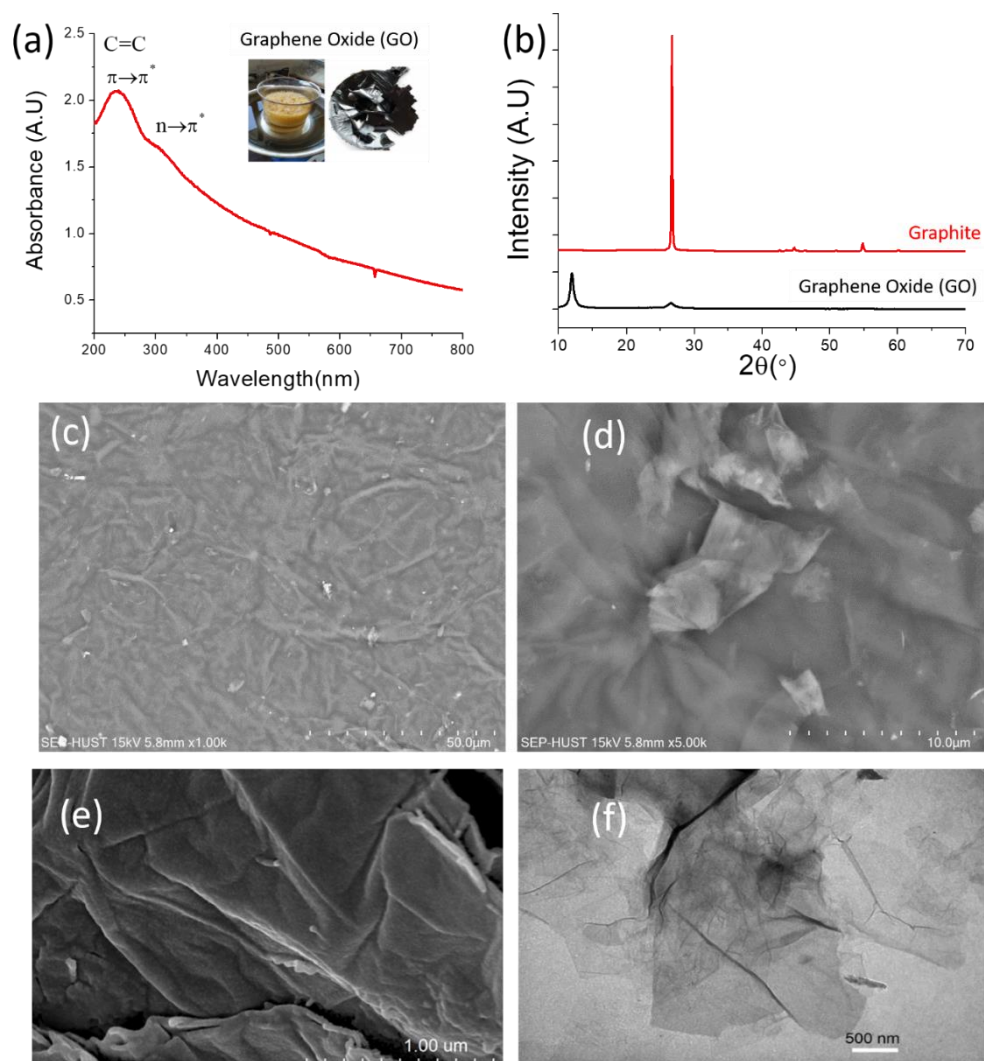

**Figure SI.1.** Characterizations of GO: (a) UV-Vis spectrum (inserted figure: digital photo of GO solution and GO flakes); (b) XRD; (c, d) SEM; (e) FE-SEM and (f) TEM images

## 2. FT-IR of CS and GFC

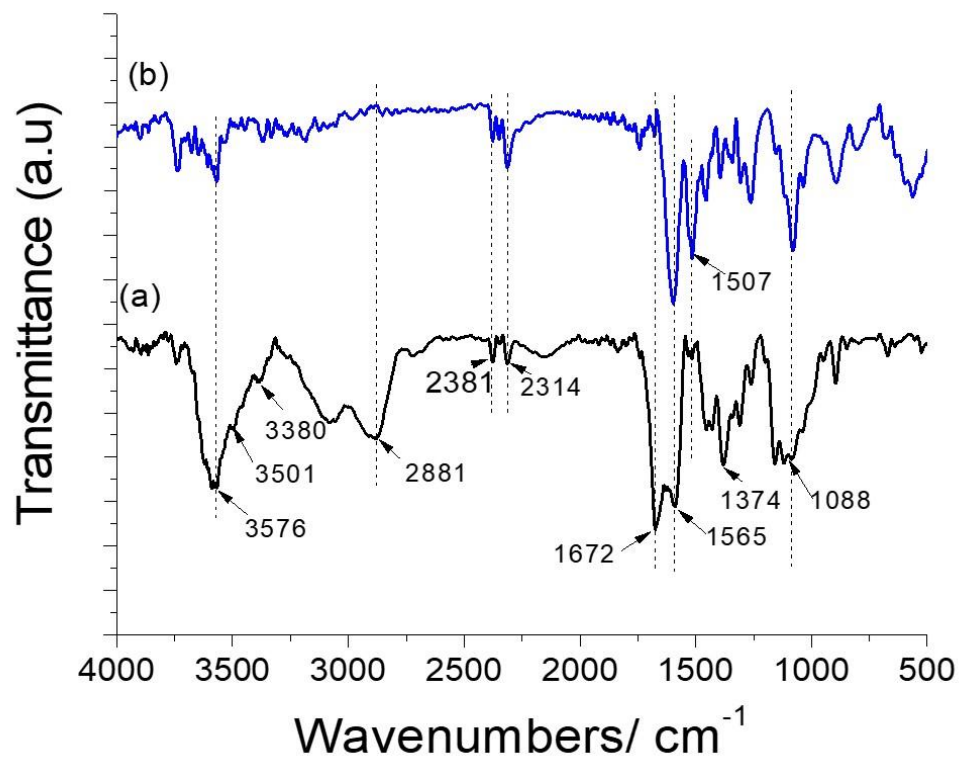

**Figure SI.2.** FT-IR spectra of: (a) chitosan (CS) and (b) graphene oxide/Fe<sub>3</sub>O<sub>4</sub>/chitosan (GFC)

## 2. Calibration curve for determine methyl orange (MO) concentration

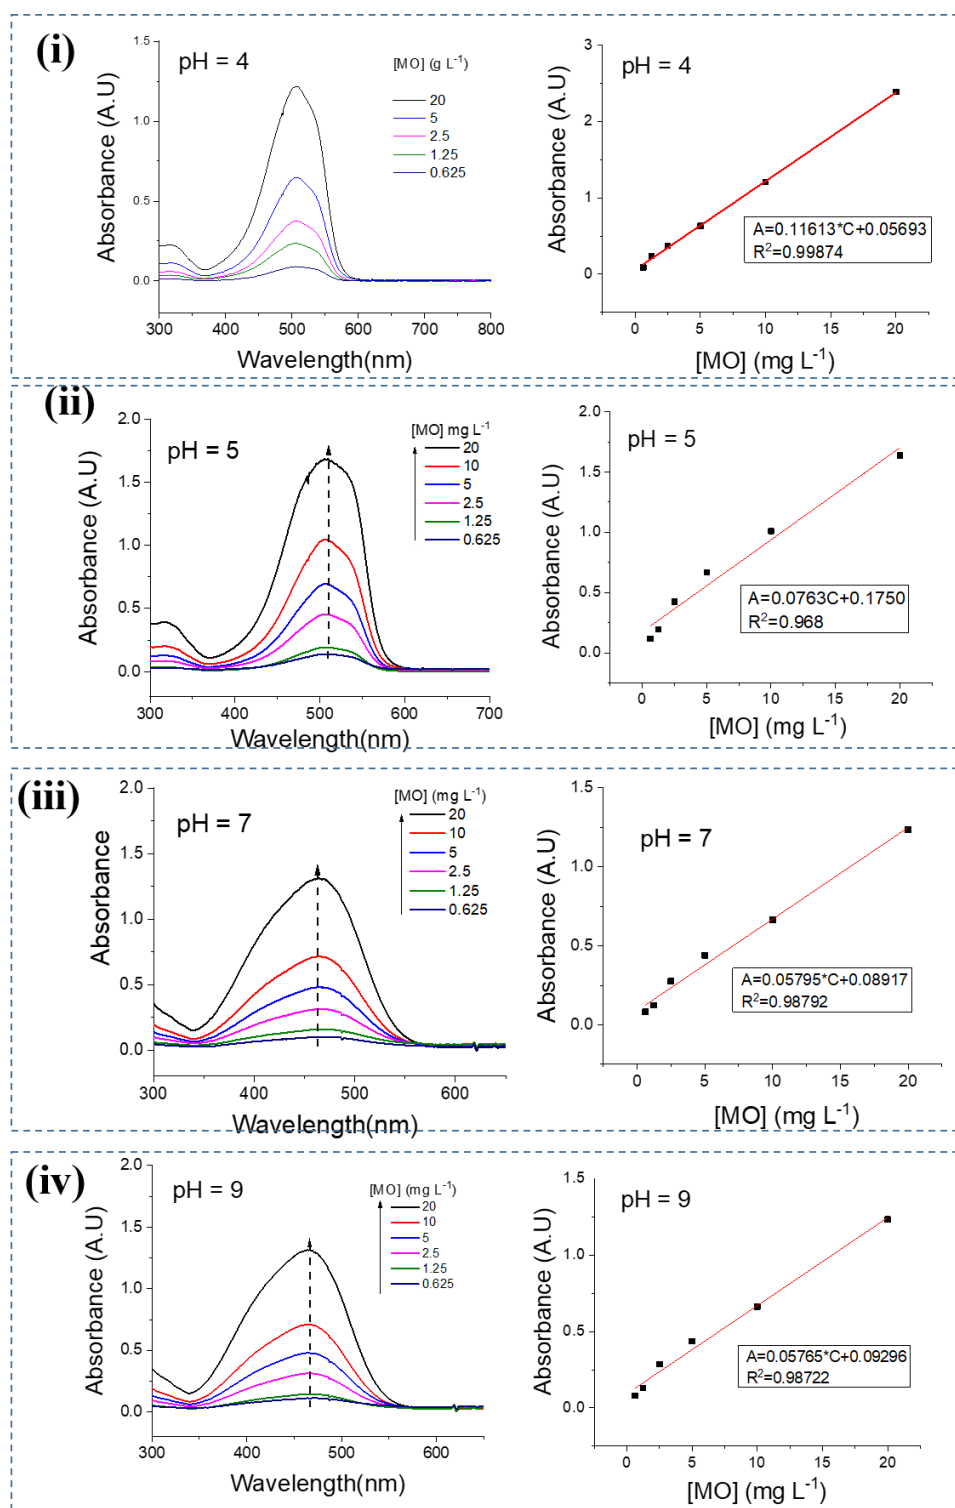

**Figure S1.3.** (right) UV-Vis spectra of MO solution at various MO concentrations and (left) corresponding calibration curves for [MO] determination at various pH: (i) pH = 4, (ii) pH = 5, (iii) pH = 7 and (iv) pH = 9

### 3. Calibration curve for determine methylene blue (MB) concentration

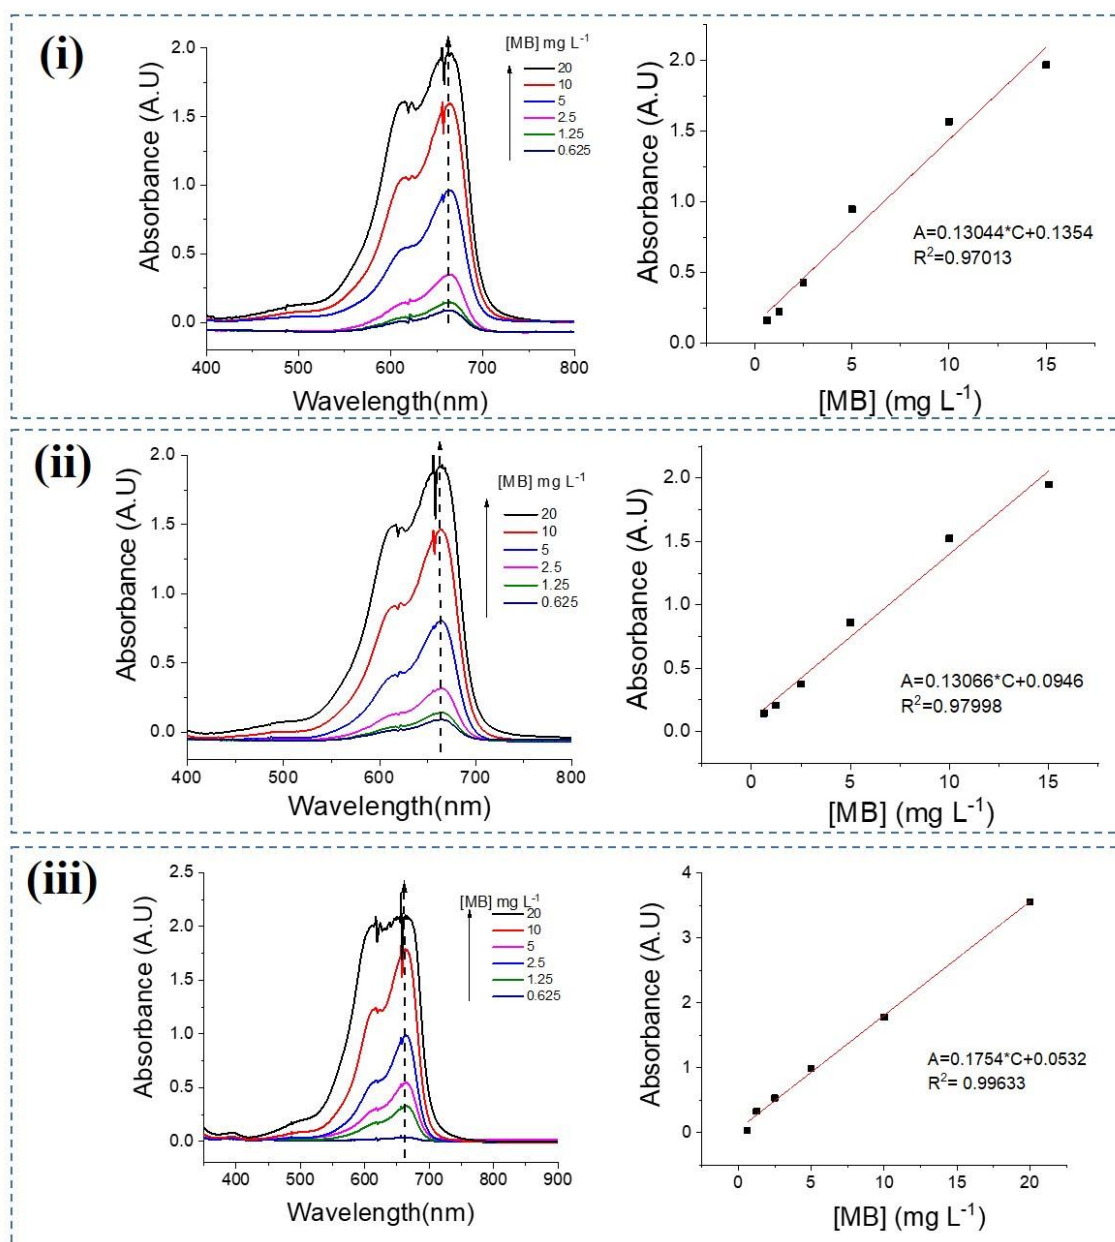

**Figure SI.4.** (right) UV-Vis spectra of MB solution at various MB concentrations and (left) corresponding calibration curves for [MB] determination at various pH: (i) pH = 5, (ii) pH = 7 and (iii) pH = 9

#### 4. Calibration curve for determine congo red (CR) concentration

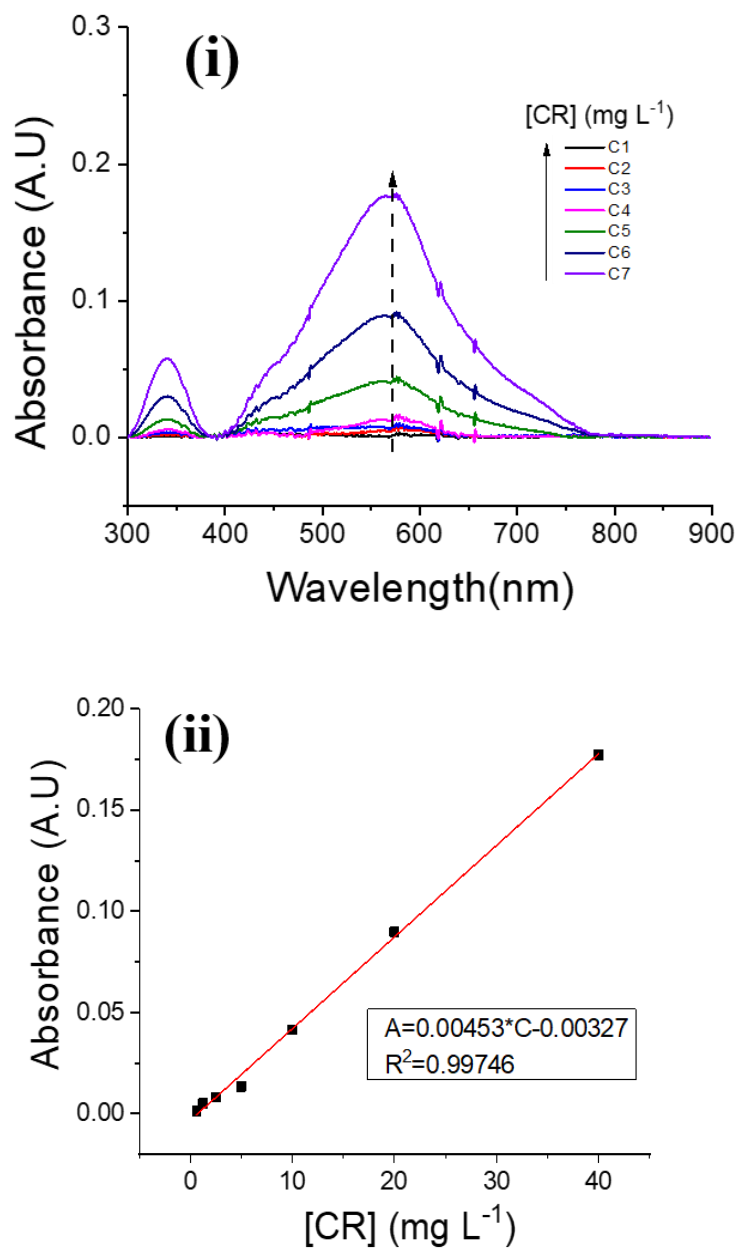

**Figure SI.5.** (i) UV-Vis spectra of CR solution at various CR concentrations and (ii) corresponding calibration curves for [CR] determination at pH = 4

## 5. Calibration curve for determine moderacid red (RS) concentration

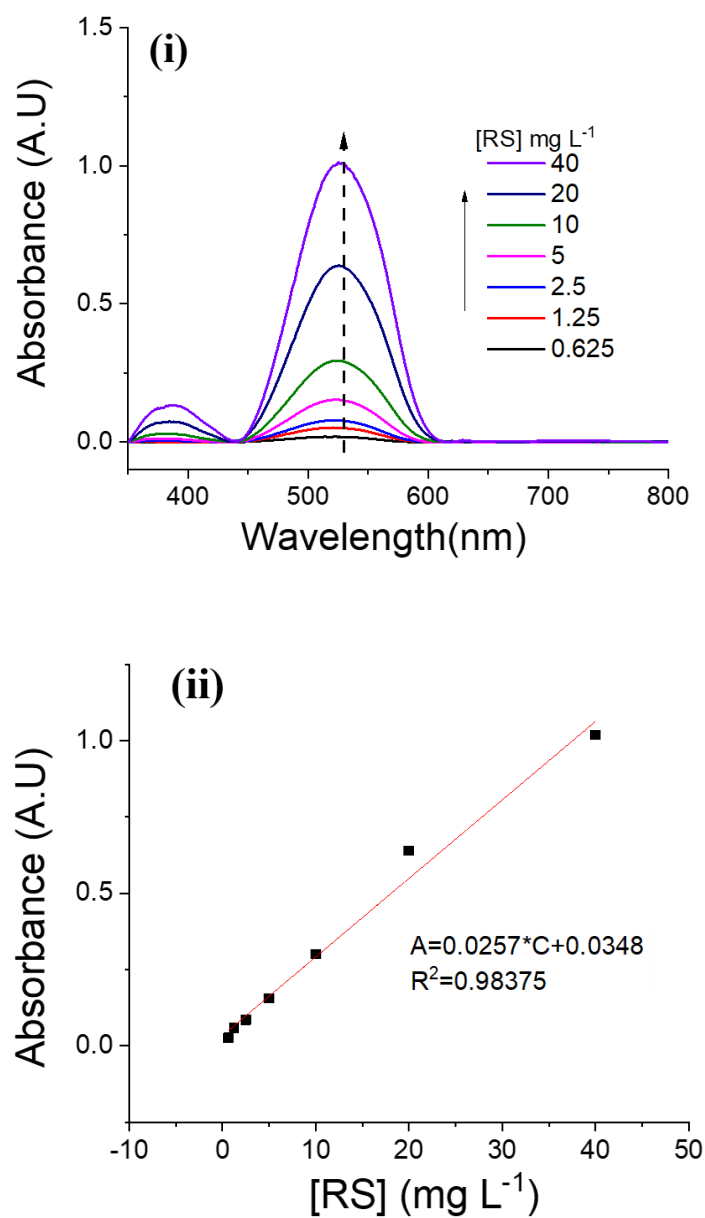

**Figure SI.6** (i) UV-Vis spectra of RS solution at various RS concentrations and (ii) corresponding calibration curves for [CR] determination at pH = 4



## 6. Adsorption isotherm according to Langmuir and Freundlich models

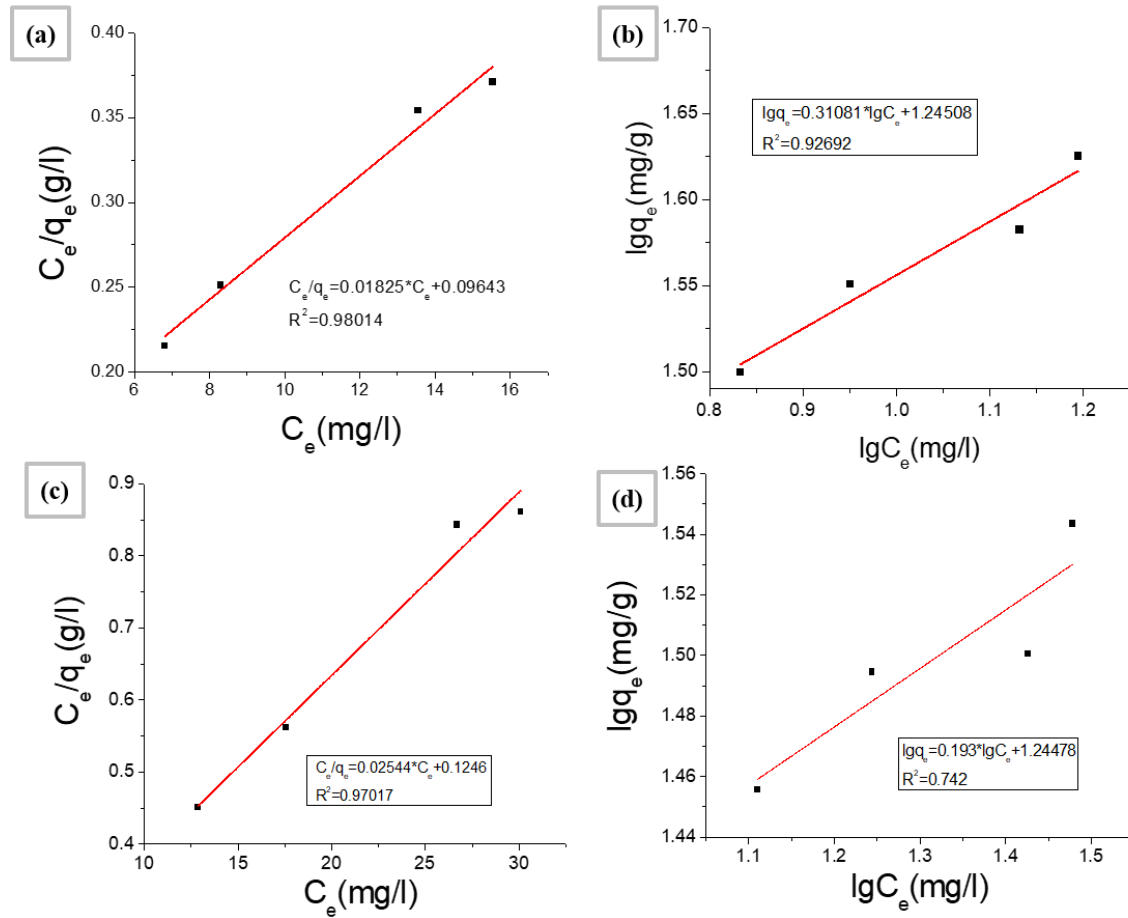

**Fig. SI.7.** Adsorption isotherm according to (a, c) Langmuir and (b, d) Freundlich models of MB on (a, b) GFCs/NWPFs and (c, d) bulk GFCs, respectively.

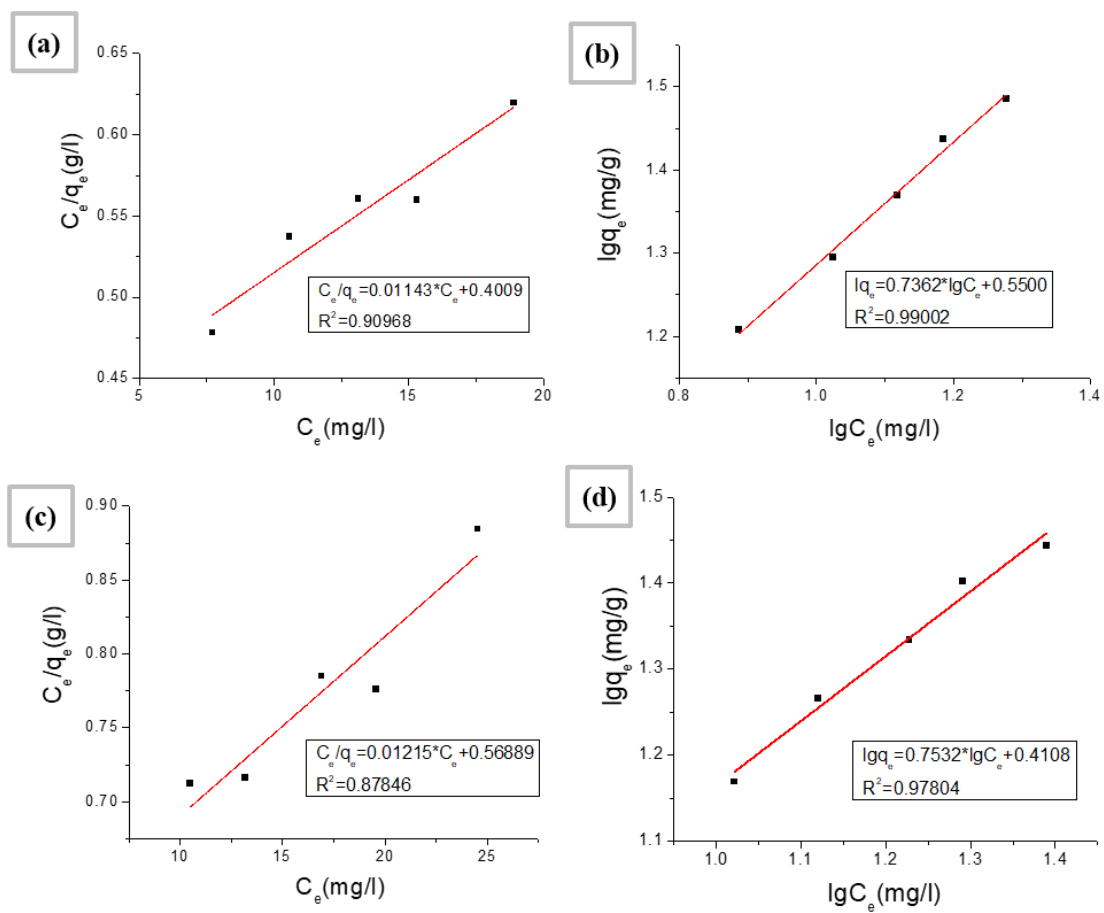

**Fig. SI.8.** Adsorption isotherm according to (a, c) Langmuir and (b, d) Freundlich models of MO on (a, b) GFCs/NWPFs and (c, d) bulk GFCs, respectively.

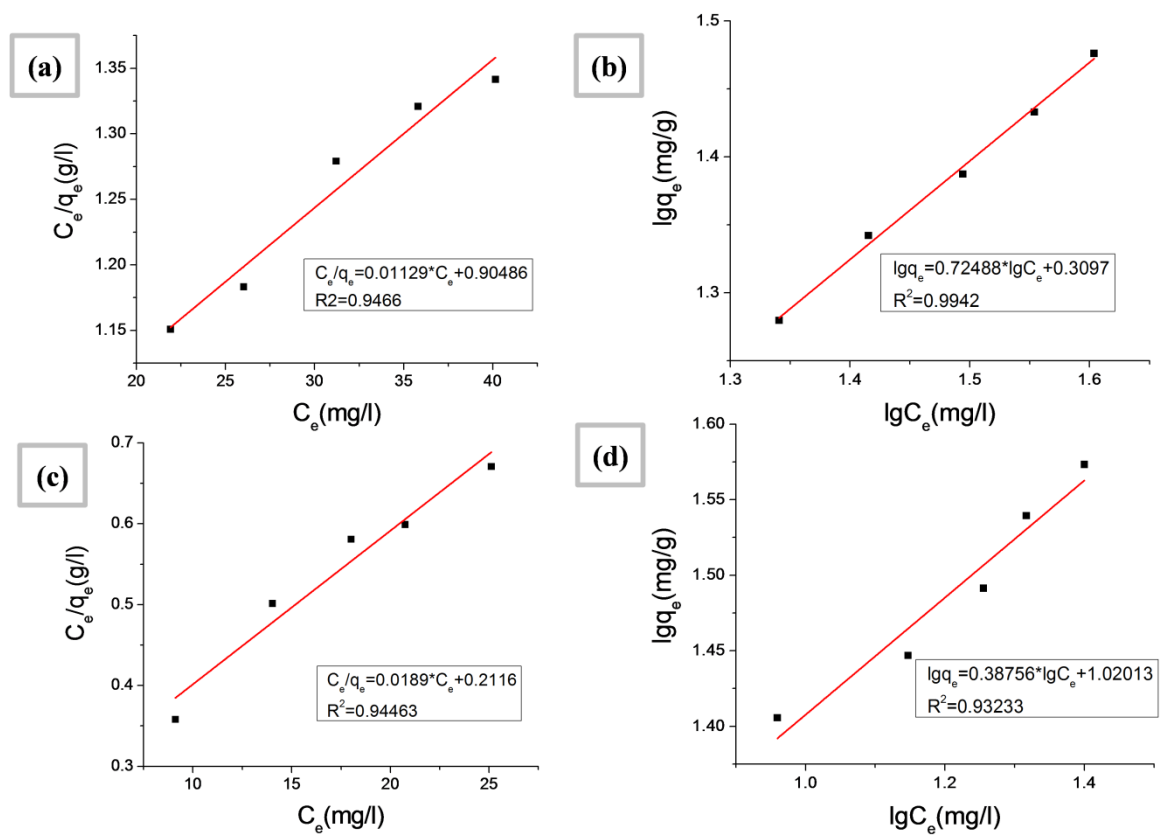

**Fig. SI.9.** Adsorption isotherm according to (a, c) Langmuir and (b, d) Freundlich models of CR on (a, b) GFCs/NWPFs and (c, d) bulk GFCs, respectively.

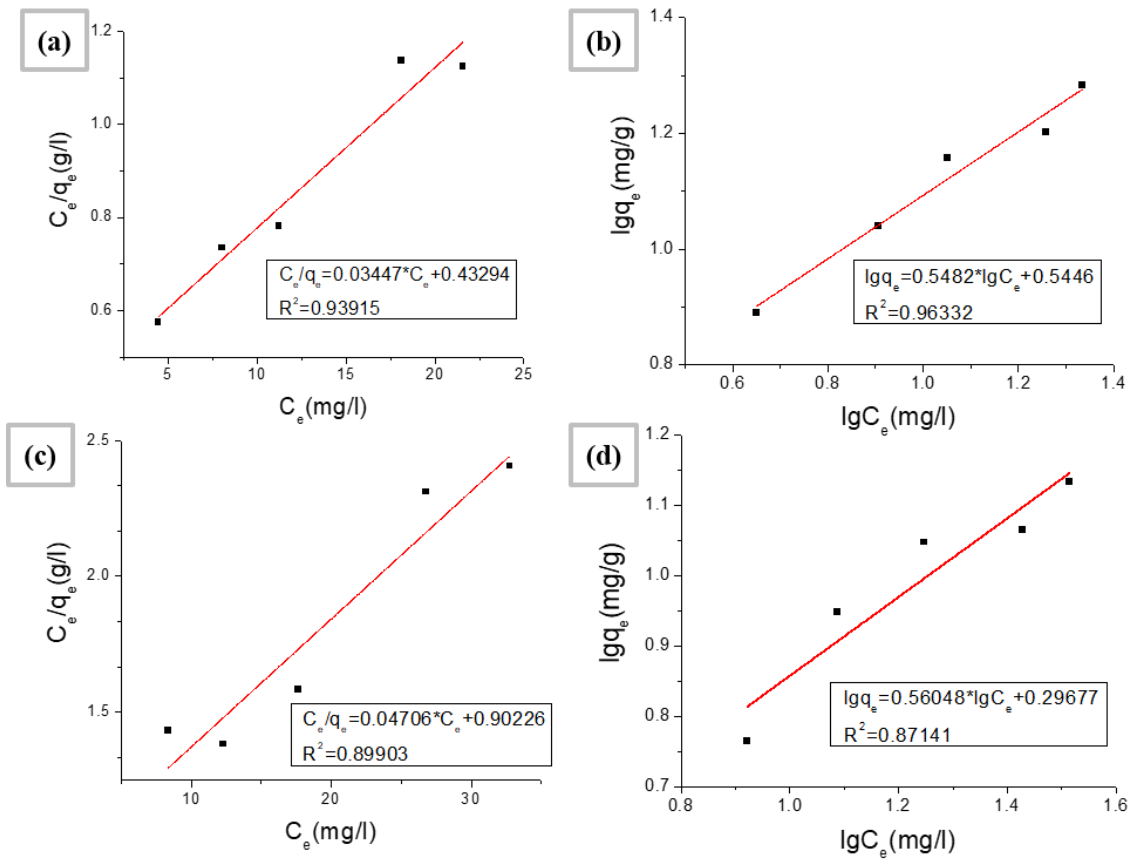

**Fig. SI.10.** Adsorption isotherm according to (a, c) Langmuir and (b, d) Freundlich models of RS on (a, b) GFCs/NWPFs and (c, d) bulk GFCs, respectively.

## References

- [1] H. V. Tran, L. T. Bui, T. T. Dinh, D. H. Le, C. D. Huynh, A. X. Trinh, Graphene oxide/Fe<sub>3</sub>O<sub>4</sub>/chitosan nanocomposite: a recoverable and recyclable adsorbent for organic dyes removal. Application to methylene blue, *Materials Research Express*, 4 (2017) Article number 035701.
- [2] Z. Zhang, J. Kong, Novel magnetic Fe<sub>3</sub>O<sub>4</sub>@ C nanoparticles as adsorbents for removal of organic dyes from aqueous solution, *Journal of Hazardous Materials*, 193 (2011) 325-329.
- [3] L. Fan, C. Luo, M. Sun, H. Qiu, X. Li, Synthesis of magnetic β-cyclodextrin–chitosan/graphene oxide as nanoadsorbent and its application in dye adsorption and removal, *Colloids and Surfaces B: Biointerfaces*, 103 (2013) 601-607.
- [4] W. Song, B. Gao, X. Xu, L. Xing, S. Han, P. Duan, W. Song, R. Jia, Adsorption–desorption behavior of magnetic amine/Fe<sub>3</sub>O<sub>4</sub> functionalized biopolymer resin towards anionic dyes from wastewater, *Bioresource technology*, 210 (2016) 123-130.
- [5] R. Jiang, Y.-Q. Fu, H.-Y. Zhu, J. Yao, L. Xiao, Removal of methyl orange from aqueous solutions by magnetic maghemite/chitosan nanocomposite films: adsorption kinetics and equilibrium, *Journal of Applied Polymer Science*, 125 (2012) E540-E549.
- [6] M. Hernández-Zamora, F. Martínez-Jerónimo, Congo red dye diversely affects organisms of different trophic levels: a comparative study with microalgae, cladocerans, and zebrafish embryos, *Environmental Science and Pollution Research*, 26 (2019) 11743-11755.

- [7] N. T. Nguyen, N. T. Nguyen, V. A. Nguyen, In Situ Synthesis and Characterization of ZnO/Chitosan Nanocomposite as an Adsorbent for Removal of Congo Red from Aqueous Solution, *Advances in Polymer Technology*, Volume 2020 (2020) Article ID 3892694.
- [8] J. Xu, D. Xu, B. Zhu, B. Cheng, C. Jiang, Adsorptive removal of an anionic dye Congo red by flower-like hierarchical magnesium oxide (MgO)-graphene oxide composite microspheres, *Applied Surface Science*, 435 (2018) 1136-1142.
- [9] W. Zhang, H. Li, X. Kan, L. Dong, H. Yan, Z. Jiang, H. Yang, A. Li, R. Cheng, Adsorption of anionic dyes from aqueous solutions using chemically modified straw, *Bioresource Technology*, 117 (2012) 40-47.
- [10] H. V. Tran, H. V. Nguyen, D. V. Vu, T. D. Le, B. T. Nguyen, D. H. Le, Carbon coated MFe<sub>2</sub>O<sub>4</sub> (M=Fe, Co, Ni) magnetite nanoparticles: A smart adsorbent for direct yellow and moderacid red dyes, *Korean Journal of Chemical Engineering*, In Press (2021).
- [11] Y.-R. Zhang, P. Su, J. Huang, Q.-R. Wang, B.-X. Zhao, A magnetic nanomaterial modified with poly-lysine for efficient removal of anionic dyes from water, *Chemical Engineering Journal*, 262 (2015) 313-318.
- [12] C. Fernández, M. S. Larrechi, M. P. Callao, An analytical overview of processes for removing organic dyes from wastewater effluents, *TrAC Trends in Analytical Chemistry*, 29 (2010) 1202-1211.
